# Supplementary material
Source: PubMed Central journal article supplement (PMC3075106)
Supplement: supp_00309.2010_suppmat.pdf [file supp_00309.2010_suppmat.pdf]

## PLASMIDS, ANTIBODIES & REAGENTS

**Plasmids:** Dominant negative constructs DN Cdc42-GFP/mRed and DN AP180, pDesRed2-Nuc and mRed caveolin-1 were generous gifts from Dr Pagano's laboratory.

**Endocytic Pathway Markers** are all purchased from Molecular Probes: BODIPY-LacCer (Cat# B34402), Alexa Fluor 594 transferrin (Cat# T13343), Alexa Fluor 488 transferrin (Cat# T13342), Alexa Fluor 647 transferrin (Cat# T23366), Alexa Fluor 594 dextran, (Cat# D22913), or Alexa Fluor 488 dextran (Cat# D22910), Alexa Fluor 647 dextran (Cat# D22914). **Pharmacological Inhibitors:** PP2 (Calbiochem, Cat# 529573), Clostridium difficile Toxin B (C. ToxinB) (Calbiochem, Cat# 616377), Genistein (Sigma, Cat# G6776-10mg), Chlorpromazine (CPZ) (Sigma, Cat# C8138-5G), Methyl- $\beta$ -Cyclodextrin (m $\beta$ -CD) (Sigma, Cat# C45555-10g), Nystatin (Sigma, Cat# N4014-50mg). Lipofectamine Plus transfection kit was purchased from Invitrogen (Cat# 10964-013). **Antibodies:** rabbit anti- total caveolin-1 (BD Transduction, Cat# 610059), mouse anti-PM caveolin-1 (BD Transduction, Cat# 610494), rabbit anti-phospho Src (Invitrogen, Cat# 44-660G), mouse anti-total Src ((Upstate Cat# 05-184 Clone GD11), Alexa Fluor 488-conjugated goat anti-rabbit IgG and goat anti-mouse IgG (Invitrogen, Cat# A11008 and A11017). **Buffers and solutions:** isotonic HMEM [2% of 50x MEM amino acids solution (Invitrogen), 1% of 100x MEM vitamin solution (Invitrogen), KCl 400mg/ml, NaCl 8000mg/ml, Glucose 229mg/ml, HEPES 3280mg/ml, KH<sub>2</sub>PO<sub>4</sub> 60mg/ml, Na<sub>2</sub>HPO<sub>4</sub> 25.4mg, CaCl<sub>2</sub> 18.5mg/ml, MgSO<sub>4</sub> 20mg/ml, osmolarity 290mOsm, pH 7.4]; hypertonic HMEM [adding extra Na<sub>2</sub>HPO<sub>4</sub> 0.312g and NaCl 1.929g in one liter isotonic HMEM, osmolarity 340mOsm, pH 7.4].
